# Supplementary figures and images for: Efficacy and safety of tafamidis doses in the Tafamidis in Transthyretin Cardiomyopathy Clinical Trial (ATTR‐ACT) and long‐term extension study
Source: PubMed Central journal article supplement — Eur J Heart Fail. 2020 Nov 12;23(2):277–85. doi: 10.1002/ejhf.2027 (PMC8048553; doi:10.1002/ejhf.2027), 2020-11-12

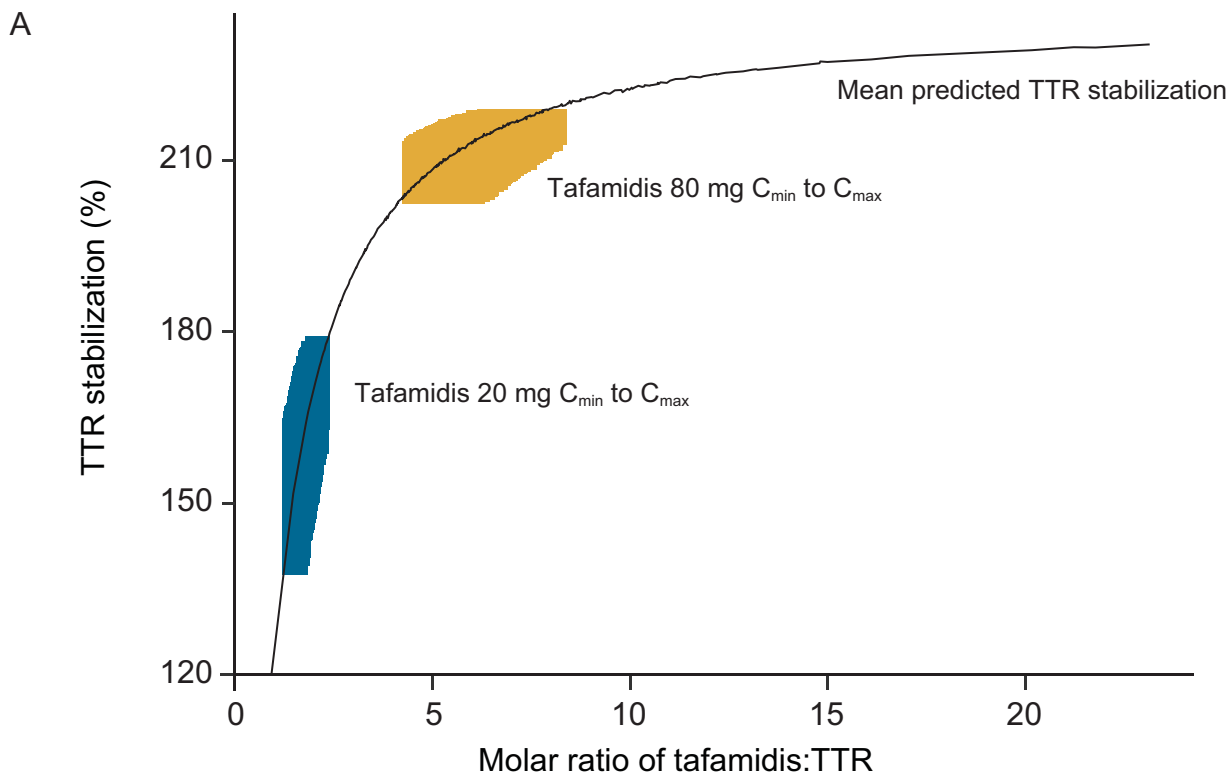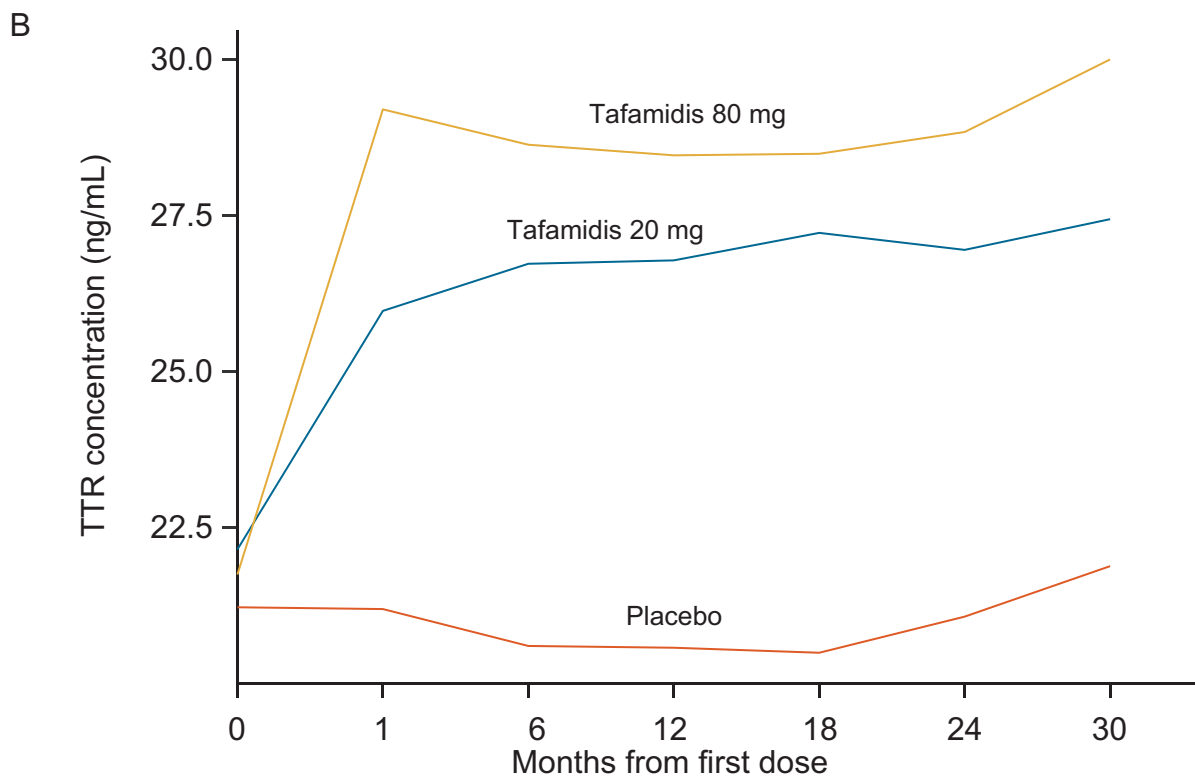

Supplement: EJHF-23-277-s005.pdf [file EJHF-23-277-s005.pdf]
